# Supplementary material for: Circadian Variation of the Human Metabolome Captured by Real-Time Breath Analysis
Source: PubMed Central journal article supplement (PMC4278702; doi:10.1371/journal.pone.0114422), 2014-12-29
Supplement: pone.0114422.s001.pdf [file pone.0114422.s001.pdf]

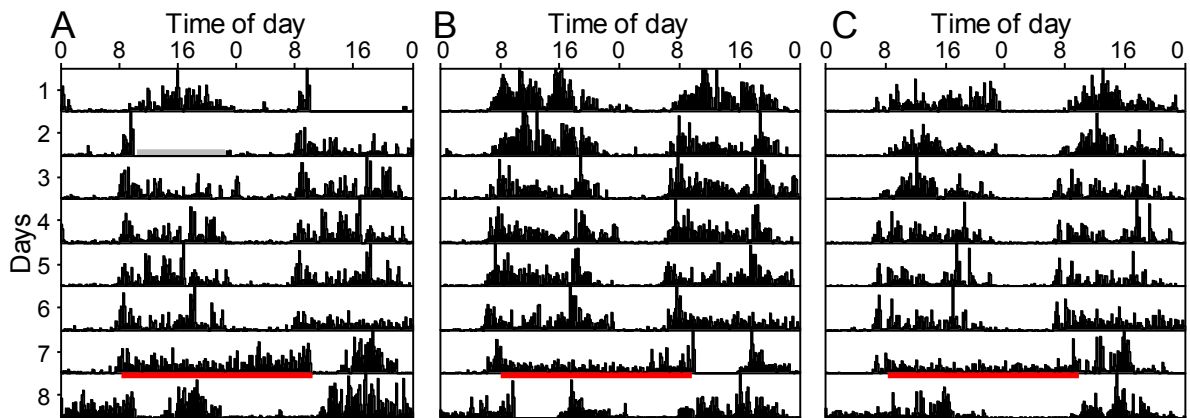

**Figure S1.** Normalized double-plotted actograms of wrist actigraphy (Actiwatch worn on the wrist of the non-dominant hand) from participants A (left), B (middle) and C (right). Red underlined area signifies the 24 hrs of the breath sampling on day 7 and 8 of the recording. Grey shaded area signifies malfunction of the actigraph.
