# Supplementary material for: Circadian Variation of the Human Metabolome Captured by Real-Time Breath Analysis
Source: PubMed Central journal article supplement (PMC4278702; doi:10.1371/journal.pone.0114422), 2014-12-29
Supplement: pone.0114422.s002.pdf [file pone.0114422.s002.pdf]

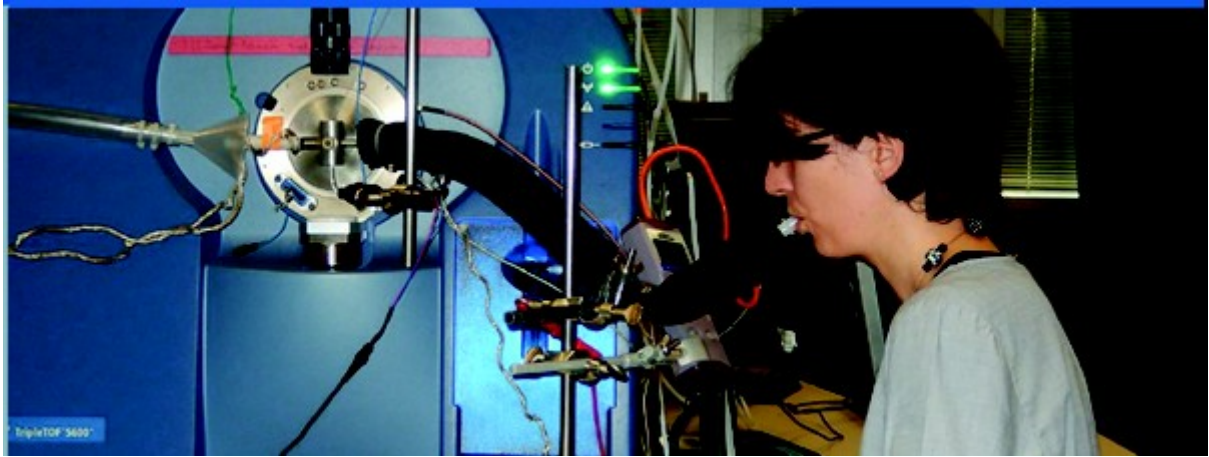

**Figure S2.** Commercial atmospheric pressure ionization mass spectrometer modified to analyze exhaled breath in real-time (symbolic picture only, not a participant of the study).
