# Supplementary material for: Circadian Variation of the Human Metabolome Captured by Real-Time Breath Analysis
Source: PubMed Central journal article supplement (PMC4278702; doi:10.1371/journal.pone.0114422), 2014-12-29
Supplement: pone.0114422.s004.pdf [file pone.0114422.s004.pdf]

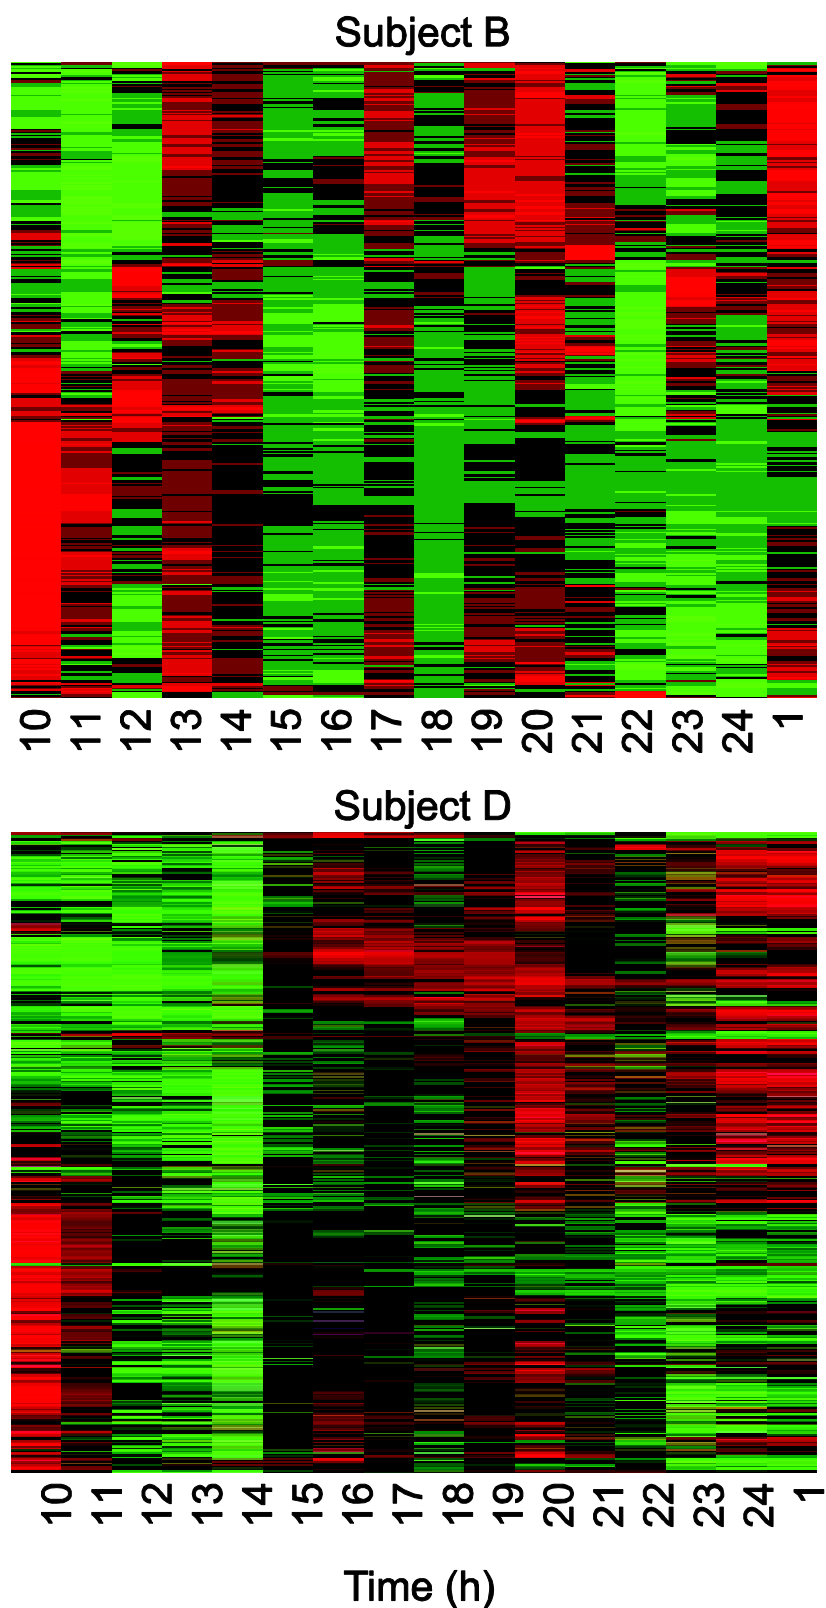

**Figure S4.** Individual heat-maps for **Participant B** and an additional volunteer (D) as measured in a different instrument (Sciex's TripleTOF). The relative intensity of ~ 400 features during 15 hours is plot.
