# Supplementary material for: Circadian Variation of the Human Metabolome Captured by Real-Time Breath Analysis
Source: PubMed Central journal article supplement (PMC4278702; doi:10.1371/journal.pone.0114422), 2014-12-29
Supplement: pone.0114422.s005.pdf [file pone.0114422.s005.pdf]

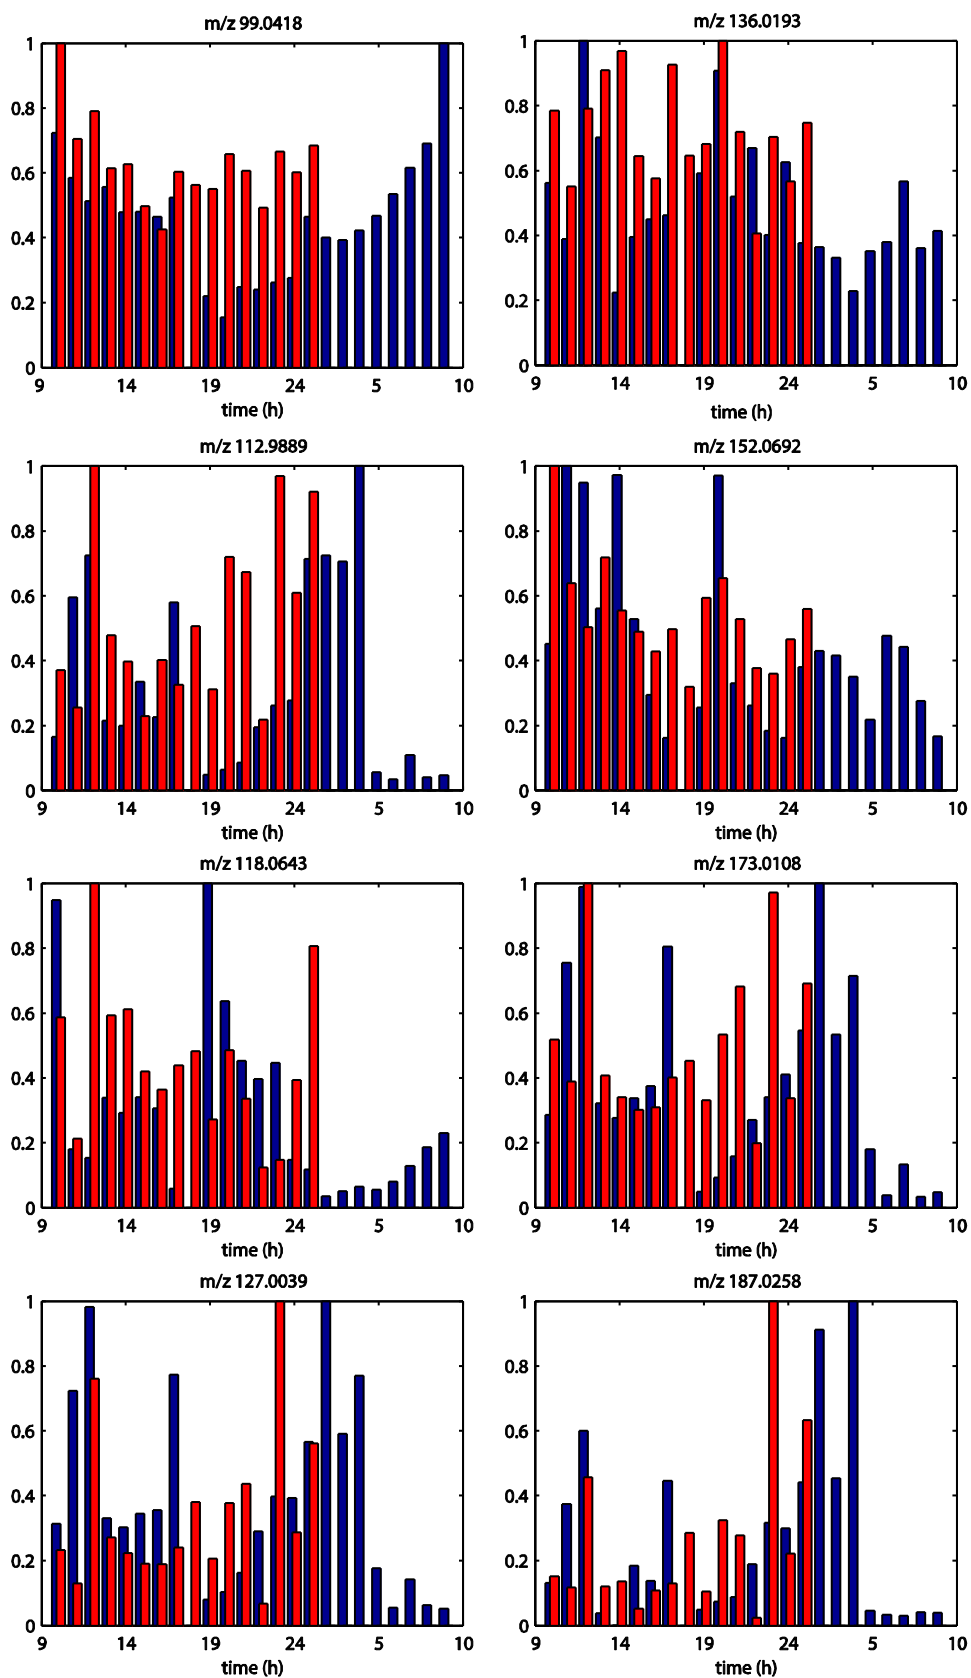

**Figure S5.** Temporal trends of exhaled metabolites are reasonably reproducible. The figure compares the relative breath intensity of eight compounds exhaled by participant B in two different mass spectrometers (Water's synapt in blue; Sciex's Tripletof in red).
