# Supplementary material for: Circadian Variation of the Human Metabolome Captured by Real-Time Breath Analysis
Source: PubMed Central journal article supplement (PMC4278702; doi:10.1371/journal.pone.0114422), 2014-12-29
Supplement: pone.0114422.s006.pdf [file pone.0114422.s006.pdf]

**Table S1.** Most likely chemical formulas of observed features.

| <b>Input mass</b> | <b>Adduct</b>          | <b>Mass</b> | <b>Dppm</b> | <b>Formula</b> |
|-------------------|------------------------|-------------|-------------|----------------|
| 59.05583          | [M+H] <sup>+</sup>     | 58.041865   | 113         | C3H6O          |
| 99.03254          | [M+H-H2O] <sup>+</sup> | 116.0334254 | 18          | C2H4N4O2       |
| 109.0671          | [M+H] <sup>+</sup>     | 108.0575118 | 21          | C7H8O          |
| 109.0671          | [M+H-H2O] <sup>+</sup> | 126.0680796 | 16          | C7H10O2        |
| 111.0324          | [M+H-H2O] <sup>+</sup> | 128.0334254 | 15          | C3H4N4O2       |
| 112.034           | [M+H] <sup>+</sup>     | 111.032029  | 47          | C5H5NO2        |
| 112.9939          | [M+H] <sup>+</sup>     | 111.9830293 | 31          | CH4O4S         |
| 113.0293          | [M+H] <sup>+</sup>     | 112.027278  | 46          | C4H4N2O2       |
| 113.0293          | [M+H-H2O] <sup>+</sup> | 130.0266087 | 48          | C5H6O4         |
| 113.0475          | [M+H] <sup>+</sup>     | 112.0346709 | 49          | C6H8S          |
| 113.0475          | [M+H] <sup>+</sup>     | 112.038511  | 15          | C3H4N4O        |
| 113.0475          | [M+H-H2O] <sup>+</sup> | 130.0452356 | 44          | C6H10OS        |
| 113.0475          | [M+H-H2O] <sup>+</sup> | 130.0530982 | 25          | C8H6N2         |
| 115.0266          | [M+H] <sup>+</sup>     | 114.0139355 | 46          | C5H6OS         |
| 115.0266          | [M+H-H2O] <sup>+</sup> | 132.0245002 | 42          | C5H8O2S        |
| 117.0589          | [M+H] <sup>+</sup>     | 116.047345  | 36          | C5H8O3         |
| 117.0589          | [M+H-H2O] <sup>+</sup> | 134.0579088 | 31          | C5H10O4        |
| 117.0589          | [M+H-H2O] <sup>+</sup> | 134.059246  | 20          | C6H6N4         |
| 118.0675          | [M+H] <sup>+</sup>     | 117.057849  | 20          | C8H7N          |
| 119.0308          | [M+H] <sup>+</sup>     | 118.0200835 | 28          | C3H6N2OS       |
| 119.0308          | [M+H] <sup>+</sup>     | 118.02661   | 25          | C4H6O4         |
| 119.0308          | [M+H-H2O] <sup>+</sup> | 136.0346709 | 9           | C8H8S          |
| 119.0308          | [M+H-H2O] <sup>+</sup> | 136.037175  | 30          | C4H8O5         |
| 119.0308          | [M+H-H2O] <sup>+</sup> | 136.0380418 | 37          | C5H12S2        |
| 119.0308          | [M+H-H2O] <sup>+</sup> | 136.038511  | 41          | C5H4N4O        |
| 122.9803          | [M+H-H2O] <sup>+</sup> | 139.9779439 | 41          | C2H4O5S        |
| 122.9803          | [M+H-H2O] <sup>+</sup> | 139.9788123 | 34          | C3H8S3         |
| 127.009           | [M+H] <sup>+</sup>     | 125.998682  | 23          | C2H6O4S        |
| 127.009           | [M+H-H2O] <sup>+</sup> | 144.0067416 | 39          | C6H8S2         |
| 127.026           | [M+H] <sup>+</sup>     | 126.0139355 | 37          | C6H6OS         |
| 129.0419          | [M+H] <sup>+</sup>     | 128.0334254 | 9           | C3H4N4O2       |
| 129.0419          | [M+H] <sup>+</sup>     | 128.040819  | 48          | C5H8N2S        |
| 129.0419          | [M+H-H2O] <sup>+</sup> | 146.0401503 | 34          | C6H10O2S       |
| 129.0419          | [M+H-H2O] <sup>+</sup> | 146.0480128 | 26          | C8H6N2O        |
| 131.0321          | [M+H] <sup>+</sup>     | 130.020085  | 36          | C4H6N2OS       |
| 131.0321          | [M+H] <sup>+</sup>     | 130.0266087 | 13          | C5H6O4         |
| 131.0321          | [M+H-H2O] <sup>+</sup> | 148.0371734 | 17          | C5H8O5         |
| 131.0321          | [M+H-H2O] <sup>+</sup> | 148.0380418 | 24          | C6H12S2        |
| 136.0234          | [M+H] <sup>+</sup>     | 135.0142699 | 13          | C7H5NS         |
| 136.0234          | [M+NH4] <sup>+</sup>   | 117.9902232 | 4           | C3H2O5         |
| 141.024           | [M+H] <sup>+</sup>     | 140.0109586 | 40          | C6H4O4         |
| 141.024           | [M+H] <sup>+</sup>     | 140.022192  | 38          | C5H4N2O3       |
| 141.024           | [M+H-H2O] <sup>+</sup> | 158.0215233 | 36          | C6H6O5         |
| 141.024           | [M+H-H2O] <sup>+</sup> | 158.032758  | 42          | C5H6N2O4       |
| 141.042           | [M+H] <sup>+</sup>     | 140.0295856 | 36          | C7H8OS         |
| 141.042           | [M+H] <sup>+</sup>     | 140.040819  | 43          | C6H8N2S        |
| 141.042           | [M+NH4] <sup>+</sup>   | 123.0142699 | 43          | C6H5NS         |
| 141.042           | [M+H-H2O] <sup>+</sup> | 158.0401503 | 32          | C7H10O2S       |
| 141.042           | [M+H-H2O] <sup>+</sup> | 158.0439901 | 5           | C4H6N4O3       |
| 149.0979          | [M+H] <sup>+</sup>     | 148.088815  | 12          | C10H12O        |

| Input mass | Adduct                              | Mass        | Dppm | Formula    |
|------------|-------------------------------------|-------------|------|------------|
| 149.0979   | [M+H] <sup>+</sup>                  | 148.0921858 | 10   | C7H16OS    |
| 149.0979   | [M+NH <sub>4</sub> ] <sup>+</sup>   | 131.058226  | 39   | C5H9NO3    |
| 149.0979   | [M+NH <sub>4</sub> ] <sup>+</sup>   | 131.0694765 | 36   | C4H9N3O2   |
| 149.0979   | [M+H-H <sub>2</sub> O] <sup>+</sup> | 166.0966944 | 26   | C6H10N6    |
| 149.0979   | [M+H-H <sub>2</sub> O] <sup>+</sup> | 166.099371  | 8    | C10H14O2   |
| 150.9758   | [M+H-H <sub>2</sub> O] <sup>+</sup> | 167.982378  | 25   | C3H5O6P    |
| 151.0254   | [M+H] <sup>+</sup>                  | 150.0139355 | 27   | C8H6OS     |
| 151.0254   | [M+H-H <sub>2</sub> O] <sup>+</sup> | 168.0245005 | 24   | C8H8O2S    |
| 151.0254   | [M+H-H <sub>2</sub> O] <sup>+</sup> | 168.028341  | 1    | C5H4N4O3   |
| 152.0636   | [M+H] <sup>+</sup>                  | 151.04941   | 45   | C5H5N5O    |
| 152.0636   | [M+H] <sup>+</sup>                  | 151.063284  | 45   | C8H9NO2    |
| 152.0636   | [M+NH <sub>4</sub> ] <sup>+</sup>   | 134.032758  | 19   | C3H6N2O4   |
| 152.0636   | [M+NH <sub>4</sub> ] <sup>+</sup>   | 134.0367794 | 46   | C8H6O2     |
| 152.0636   | [M+H-H <sub>2</sub> O] <sup>+</sup> | 169.073894  | 49   | C8H11NO3   |
| 152.9904   | [M+H] <sup>+</sup>                  | 151.9779439 | 33   | C3H4O5S    |
| 152.9904   | [M+H] <sup>+</sup>                  | 151.9874598 | 28   | C3H5O5P    |
| 152.9904   | [M+H-H <sub>2</sub> O] <sup>+</sup> | 169.9885086 | 30   | C3H6O6S    |
| 152.9904   | [M+H-H <sub>2</sub> O] <sup>+</sup> | 169.9980245 | 31   | C3H7O6P    |
| 154.9869   | [M+H] <sup>+</sup>                  | 153.9758354 | 24   | C3H6O3S2   |
| 155.0573   | [M+H] <sup>+</sup>                  | 154.0452356 | 30   | C8H10OS    |
| 155.0573   | [M+NH <sub>4</sub> ] <sup>+</sup>   | 137.0299199 | 41   | C7H7NS     |
| 155.0573   | [M+H-H <sub>2</sub> O] <sup>+</sup> | 172.0524268 | 49   | C11H8O2    |
| 155.0573   | [M+H-H <sub>2</sub> O] <sup>+</sup> | 172.0636629 | 23   | C10H8N2O   |
| 157.0368   | [M+H] <sup>+</sup>                  | 156.0245002 | 31   | C7H8O2S    |
| 157.0368   | [M+H] <sup>+</sup>                  | 156.034193  | 29   | C8H9ClO    |
| 157.0368   | [M+H] <sup>+</sup>                  | 156.0357336 | 39   | C6H8N2OS   |
| 157.0368   | [M+H-H <sub>2</sub> O] <sup>+</sup> | 174.0316941 | 49   | C10H6O3    |
| 157.0368   | [M+H-H <sub>2</sub> O] <sup>+</sup> | 174.0429274 | 21   | C9H6N2O2   |
| 158.1563   | [M+NH <sub>4</sub> ] <sup>+</sup>   | 140.1201151 | 14   | C9H16O     |
| 159.0327   | [M+H] <sup>+</sup>                  | 158.0215233 | 24   | C6H6O5     |
| 159.0327   | [M+H] <sup>+</sup>                  | 158.0327567 | 46   | C5H6N2O4   |
| 159.0327   | [M+NH <sub>4</sub> ] <sup>+</sup>   | 141.0062076 | 46   | C5H3NO4    |
| 159.0327   | [M+H-H <sub>2</sub> O] <sup>+</sup> | 176.032088  | 21   | C6H8O6     |
| 159.0327   | [M+H-H <sub>2</sub> O] <sup>+</sup> | 176.040819  | 33   | C9H8N2S    |
| 159.0327   | [M+H-H <sub>2</sub> O] <sup>+</sup> | 176.0433214 | 49   | C5H8N2O5   |
| 166.9713   | [M+H-H <sub>2</sub> O] <sup>+</sup> | 183.977293  | 19   | C3H5O7P    |
| 168.9858   | [M+H] <sup>+</sup>                  | 167.9728586 | 33   | C3H4O6S    |
| 168.9858   | [M+H] <sup>+</sup>                  | 167.9823744 | 22   | C3H5O6P    |
| 168.9858   | [M+H-H <sub>2</sub> O] <sup>+</sup> | 185.992943  | 26   | C3H7O7P    |
| 168.9858   | [M+H-H <sub>2</sub> O] <sup>+</sup> | 185.9944531 | 34   | C5H3ClN4O2 |
| 170.9648   | [M+H-H <sub>2</sub> O] <sup>+</sup> | 187.9635562 | 23   | C3H8O3S3   |
| 171.052    | [M+H] <sup>+</sup>                  | 170.0401503 | 26   | C8H10O2S   |
| 171.052    | [M+H] <sup>+</sup>                  | 170.0439901 | 4    | C5H6N4O3   |
| 171.052    | [M+H] <sup>+</sup>                  | 170.051385  | 38   | C7H10N2OS  |
| 171.052    | [M+NH <sub>4</sub> ] <sup>+</sup>   | 153.0190943 | 5    | C3H8NO4P   |
| 171.052    | [M+H-H <sub>2</sub> O] <sup>+</sup> | 188.0473441 | 43   | C11H8O3    |
| 171.052    | [M+H-H <sub>2</sub> O] <sup>+</sup> | 188.0585775 | 22   | C10H8N2O2  |
| 172.99     | [M+H-H <sub>2</sub> O] <sup>+</sup> | 189.993594  | 4    | C6H6O5S    |
| 173.0139   | [M+H] <sup>+</sup>                  | 172.0007878 | 33   | C6H4O6     |
| 173.0139   | [M+H] <sup>+</sup>                  | 172.0136745 | 40   | C3H9O6P    |
| 173.0139   | [M+H-H <sub>2</sub> O] <sup>+</sup> | 190.011355  | 30   | C6H6O7     |
| 180.9854   | [M+H-H <sub>2</sub> O] <sup>+</sup> | 197.9834232 | 26   | C4H6O7S    |

| Input mass | Adduct                              | Mass        | Dppm | Formula                                                                    |
|------------|-------------------------------------|-------------|------|----------------------------------------------------------------------------|
| 180.9854   | [M+H-H <sub>2</sub> O] <sup>+</sup> | 197.9929391 | 26   | C <sub>4</sub> H <sub>7</sub> O <sub>7</sub> P                             |
| 185.068    | [M+H] <sup>+</sup>                  | 184.0524295 | 44   | C <sub>12</sub> H <sub>8</sub> O <sub>2</sub>                              |
| 185.068    | [M+H] <sup>+</sup>                  | 184.0558003 | 26   | C <sub>9</sub> H <sub>12</sub> O <sub>2</sub> S                            |
| 185.068    | [M+H] <sup>+</sup>                  | 184.0636629 | 15   | C <sub>11</sub> H <sub>8</sub> N <sub>2</sub> O                            |
| 185.068    | [M+NH <sub>4</sub> ] <sup>+</sup>   | 167.0252285 | 48   | C <sub>4</sub> H <sub>9</sub> NO <sub>4</sub> S                            |
| 185.068    | [M+NH <sub>4</sub> ] <sup>+</sup>   | 167.026567  | 41   | C <sub>5</sub> H <sub>5</sub> N <sub>5</sub> S                             |
| 185.068    | [M+NH <sub>4</sub> ] <sup>+</sup>   | 167.0347443 | 3    | C <sub>4</sub> H <sub>10</sub> NO <sub>4</sub> P                           |
| 185.068    | [M+NH <sub>4</sub> ] <sup>+</sup>   | 167.036464  | 12   | C <sub>3</sub> H <sub>9</sub> N <sub>3</sub> O <sub>3</sub> S              |
| 185.068    | [M+NH <sub>4</sub> ] <sup>+</sup>   | 167.0404846 | 34   | C <sub>8</sub> H <sub>9</sub> NOS                                          |
| 185.068    | [M+H-H <sub>2</sub> O] <sup>+</sup> | 202.0629942 | 41   | C <sub>12</sub> H <sub>10</sub> O <sub>3</sub>                             |
| 185.068    | [M+H-H <sub>2</sub> O] <sup>+</sup> | 202.0718581 | 6    | C <sub>4</sub> H <sub>15</sub> N <sub>2</sub> O <sub>5</sub> P             |
| 185.068    | [M+H-H <sub>2</sub> O] <sup>+</sup> | 202.0742276 | 18   | C <sub>11</sub> H <sub>10</sub> N <sub>2</sub> O <sub>2</sub>              |
| 185.068    | [M+H-H <sub>2</sub> O] <sup>+</sup> | 202.0782503 | 40   | C <sub>16</sub> H <sub>10</sub>                                            |
| 187.009    | [M+H-H <sub>2</sub> O] <sup>+</sup> | 204.0189365 | 38   | C <sub>8</sub> H <sub>9</sub> ClO <sub>4</sub>                             |
| 187.0284   | [M+H] <sup>+</sup>                  | 186.0164379 | 25   | C <sub>7</sub> H <sub>6</sub> O <sub>6</sub>                               |
| 187.0284   | [M+H-H <sub>2</sub> O] <sup>+</sup> | 204.0270026 | 22   | C <sub>7</sub> H <sub>8</sub> O <sub>7</sub>                               |
| 187.0284   | [M+H-H <sub>2</sub> O] <sup>+</sup> | 204.0357336 | 24   | C <sub>10</sub> H <sub>8</sub> N <sub>2</sub> OS                           |
| 189.0601   | [M+H] <sup>+</sup>                  | 188.0473441 | 28   | C <sub>11</sub> H <sub>8</sub> O <sub>3</sub>                              |
| 189.0601   | [M+H] <sup>+</sup>                  | 188.0585775 | 30   | C <sub>10</sub> H <sub>8</sub> N <sub>2</sub> O <sub>2</sub>               |
| 189.0601   | [M+NH <sub>4</sub> ] <sup>+</sup>   | 171.0217694 | 23   | C <sub>5</sub> H <sub>11</sub> Cl <sub>2</sub> NO                          |
| 189.0601   | [M+NH <sub>4</sub> ] <sup>+</sup>   | 171.0353992 | 48   | C <sub>7</sub> H <sub>9</sub> NO <sub>2</sub> S                            |
| 189.0601   | [M+H-H <sub>2</sub> O] <sup>+</sup> | 206.0579088 | 26   | C <sub>11</sub> H <sub>10</sub> O <sub>4</sub>                             |
| 189.0601   | [M+H-H <sub>2</sub> O] <sup>+</sup> | 206.069143  | 33   | C <sub>10</sub> H <sub>10</sub> N <sub>2</sub> O <sub>3</sub>              |
| 194.9997   | [M+H-H <sub>2</sub> O] <sup>+</sup> | 212.0004107 | 10   | C <sub>6</sub> H <sub>4</sub> N <sub>4</sub> O <sub>3</sub> S              |
| 196.9806   | [M+H-H <sub>2</sub> O] <sup>+</sup> | 213.9870688 | 18   | C <sub>7</sub> H <sub>6</sub> N <sub>2</sub> O <sub>2</sub> S <sub>2</sub> |
| 196.9806   | [M+H-H <sub>2</sub> O] <sup>+</sup> | 213.987858  | 22   | C <sub>4</sub> H <sub>7</sub> O <sub>8</sub> P                             |
| 197.0401   | [M+H] <sup>+</sup>                  | 196.0232546 | 48   | C <sub>6</sub> H <sub>4</sub> N <sub>4</sub> O <sub>4</sub>                |
| 197.0401   | [M+H] <sup>+</sup>                  | 196.0371734 | 22   | C <sub>9</sub> H <sub>8</sub> O <sub>5</sub>                               |
| 197.0401   | [M+H-H <sub>2</sub> O] <sup>+</sup> | 214.0412129 | 8    | C <sub>8</sub> H <sub>10</sub> N <sub>2</sub> O <sub>3</sub> S             |
| 197.0401   | [M+H-H <sub>2</sub> O] <sup>+</sup> | 214.0477381 | 24   | C <sub>9</sub> H <sub>10</sub> O <sub>6</sub>                              |
| 197.0401   | [M+H-H <sub>2</sub> O] <sup>+</sup> | 214.0490755 | 31   | C <sub>10</sub> H <sub>6</sub> N <sub>4</sub> O <sub>2</sub>               |
| 197.0401   | [M+H-H <sub>2</sub> O] <sup>+</sup> | 214.052444  | 48   | C <sub>7</sub> H <sub>10</sub> N <sub>4</sub> O <sub>2</sub> S             |
| 197.0671   | [M+H] <sup>+</sup>                  | 196.0524295 | 37   | C <sub>13</sub> H <sub>8</sub> O <sub>2</sub>                              |
| 197.0671   | [M+H] <sup>+</sup>                  | 196.059641  | 0    | C <sub>7</sub> H <sub>8</sub> N <sub>4</sub> O <sub>3</sub>                |
| 197.0671   | [M+H] <sup>+</sup>                  | 196.067035  | 36   | C <sub>9</sub> H <sub>12</sub> N <sub>2</sub> OS                           |
| 197.0671   | [M+NH <sub>4</sub> ] <sup>+</sup>   | 179.0252285 | 40   | C <sub>5</sub> H <sub>9</sub> NO <sub>4</sub> S                            |
| 197.0671   | [M+NH <sub>4</sub> ] <sup>+</sup>   | 179.0404846 | 36   | C <sub>9</sub> H <sub>9</sub> NOS                                          |
| 197.0671   | [M+NH <sub>4</sub> ] <sup>+</sup>   | 179.042987  | 49   | C <sub>5</sub> H <sub>9</sub> NO <sub>6</sub>                              |
| 197.0671   | [M+H-H <sub>2</sub> O] <sup>+</sup> | 214.0629942 | 34   | C <sub>13</sub> H <sub>10</sub> O <sub>3</sub>                             |
| 197.0671   | [M+H-H <sub>2</sub> O] <sup>+</sup> | 214.066365  | 17   | C <sub>10</sub> H <sub>14</sub> O <sub>3</sub> S                           |
| 197.0671   | [M+H-H <sub>2</sub> O] <sup>+</sup> | 214.0702048 | 1    | C <sub>7</sub> H <sub>10</sub> N <sub>4</sub> O <sub>4</sub>               |
| 197.0671   | [M+H-H <sub>2</sub> O] <sup>+</sup> | 214.0776    | 39   | C <sub>9</sub> H <sub>14</sub> N <sub>2</sub> O <sub>2</sub> S             |
| 197.9826   | [M+H-H <sub>2</sub> O] <sup>+</sup> | 214.9807768 | 23   | C <sub>8</sub> H <sub>6</sub> ClNO <sub>2</sub> S                          |
| 198.038    | [M+H] <sup>+</sup>                  | 197.0324223 | 8    | C <sub>8</sub> H <sub>7</sub> NO <sub>5</sub>                              |
| 198.038    | [M+H] <sup>+</sup>                  | 197.0357932 | 25   | C <sub>5</sub> H <sub>11</sub> NO <sub>5</sub> S                           |
| 198.038    | [M+H-H <sub>2</sub> O] <sup>+</sup> | 215.033091  | 38   | C <sub>10</sub> H <sub>5</sub> N <sub>3</sub> O <sub>3</sub>               |
| 203.0035   | [M+H] <sup>+</sup>                  | 201.993594  | 12   | C <sub>7</sub> H <sub>6</sub> O <sub>5</sub> S                             |
| 203.0236   | [M+H] <sup>+</sup>                  | 202.0113525 | 24   | C <sub>7</sub> H <sub>6</sub> O <sub>7</sub>                               |
| 203.0236   | [M+NH <sub>4</sub> ] <sup>+</sup>   | 184.9994077 | 47   | C <sub>3</sub> H <sub>7</sub> NO <sub>6</sub> S                            |
| 203.0236   | [M+H-H <sub>2</sub> O] <sup>+</sup> | 220.0219172 | 21   | C <sub>7</sub> H <sub>8</sub> O <sub>8</sub>                               |
| 205.0289   | [M+H] <sup>+</sup>                  | 204.027005  | 26   | C <sub>7</sub> H <sub>8</sub> O <sub>7</sub>                               |
| 205.0289   | [M+H-H <sub>2</sub> O] <sup>+</sup> | 222.0350649 | 16   | C <sub>11</sub> H <sub>10</sub> O <sub>3</sub> S                           |

| <b>Input mass</b> | <b>Adduct</b>                       | <b>Mass</b> | <b>Dppm</b> | <b>Formula</b>                                                              |
|-------------------|-------------------------------------|-------------|-------------|-----------------------------------------------------------------------------|
| 206.9989          | [M+H-H <sub>2</sub> O] <sup>+</sup> | 224.0078043 | 29          | C <sub>9</sub> H <sub>8</sub> N <sub>2</sub> O <sub>5</sub> S <sub>2</sub>  |
| 213.0452          | [M+H] <sup>+</sup>                  | 212.032088  | 27          | C <sub>9</sub> H <sub>8</sub> O <sub>6</sub>                                |
| 213.0452          | [M+H] <sup>+</sup>                  | 212.0473441 | 44          | C <sub>13</sub> H <sub>8</sub> O <sub>3</sub>                               |
| 213.0452          | [M+NH <sub>4</sub> ] <sup>+</sup>   | 195.020146  | 41          | C <sub>5</sub> H <sub>9</sub> N <sub>1</sub> O <sub>5</sub> S               |
| 213.0452          | [M+H-H <sub>2</sub> O] <sup>+</sup> | 230.057891  | 46          | C <sub>13</sub> H <sub>10</sub> O <sub>4</sub>                              |
| 214.9911          | [M+H] <sup>+</sup>                  | 213.9870688 | 15          | C <sub>7</sub> H <sub>6</sub> N <sub>2</sub> O <sub>2</sub> S <sub>2</sub>  |
| 214.9911          | [M+H-H <sub>2</sub> O] <sup>+</sup> | 232.0041587 | 47          | C <sub>8</sub> H <sub>8</sub> O <sub>6</sub> S                              |
| 219.0858          | [M+H] <sup>+</sup>                  | 218.0691422 | 42          | C <sub>11</sub> H <sub>10</sub> N <sub>2</sub> O <sub>3</sub>               |
| 219.0858          | [M+H] <sup>+</sup>                  | 218.072513  | 27          | C <sub>8</sub> H <sub>14</sub> N <sub>2</sub> O <sub>3</sub> S              |
| 219.0858          | [M+H] <sup>+</sup>                  | 218.072515  | 27          | C <sub>8</sub> H <sub>14</sub> N <sub>2</sub> O <sub>3</sub> S <sub>1</sub> |
| 219.0858          | [M+H] <sup>+</sup>                  | 218.073161  | 24          | C <sub>16</sub> H <sub>10</sub> O                                           |
| 219.0858          | [M+H] <sup>+</sup>                  | 218.0790382 | 2           | C <sub>9</sub> H <sub>14</sub> O <sub>6</sub>                               |
| 219.0858          | [M+H-H <sub>2</sub> O] <sup>+</sup> | 236.079708  | 40          | C <sub>11</sub> H <sub>12</sub> N <sub>2</sub> O <sub>4</sub>               |
| 219.0858          | [M+H-H <sub>2</sub> O] <sup>+</sup> | 236.0830777 | 24          | C <sub>8</sub> H <sub>16</sub> N <sub>2</sub> O <sub>4</sub> S              |
| 219.0858          | [M+H-H <sub>2</sub> O] <sup>+</sup> | 236.0837296 | 21          | C <sub>16</sub> H <sub>12</sub> O <sub>2</sub>                              |
| 219.0858          | [M+H-H <sub>2</sub> O] <sup>+</sup> | 236.090941  | 10          | C <sub>10</sub> H <sub>12</sub> N <sub>4</sub> O <sub>3</sub>               |
| 219.0858          | [M+H-H <sub>2</sub> O] <sup>+</sup> | 236.094963  | 29          | C <sub>15</sub> H <sub>12</sub> N <sub>2</sub> O                            |
| 225.0123          | [M+H] <sup>+</sup>                  | 224.0078043 | 12          | C <sub>9</sub> H <sub>8</sub> N <sub>2</sub> O <sub>5</sub> S <sub>2</sub>  |
| 239.024           | [M+H-H <sub>2</sub> O] <sup>+</sup> | 256.0371734 | 43          | C <sub>14</sub> H <sub>8</sub> O <sub>5</sub>                               |
