# Supplementary material for: Circadian Variation of the Human Metabolome Captured by Real-Time Breath Analysis
Source: PubMed Central journal article supplement (PMC4278702; doi:10.1371/journal.pone.0114422), 2014-12-29
Supplement: pone.0114422.s007.pdf [file pone.0114422.s007.pdf]

**Table S2.** Results of JTK-cycle analysis for all participants and all features.

| m/z     | p-value  |          |          | Period (PER) |    |    | Phase (LAG) |    |   | Amplitude (AMP) |      |      |
|---------|----------|----------|----------|--------------|----|----|-------------|----|---|-----------------|------|------|
|         | A        | B        | C        | A            | B  | C  | A           | B  | C | A               | B    | C    |
| 129.951 | 3.62E-05 | 5.35E-01 | 1.00E+00 | 19           | 16 | 16 | 0           | 6  | 6 | 789             | 532  | 170  |
| 127.952 | 1.21E-04 | 1.00E+00 | 1.00E+00 | 19           | 16 | 16 | 0           | 6  | 6 | 920             | 358  | 176  |
| 125.955 | 1.05E-03 | 3.57E-01 | 1.00E+00 | 19           | 11 | 16 | 0           | 10 | 6 | 1171            | 922  | 355  |
| 68.987  | 5.13E-03 | 5.31E-04 | 7.49E-02 | 23           | 22 | 17 | 1           | 15 | 2 | 2057            | 2071 | 3663 |
| 149.098 | 9.20E-03 | 5.13E-03 | 2.11E-02 | 23           | 21 | 23 | 1           | 2  | 2 | 447             | 383  | 186  |
| 118.068 | 3.56E-02 | 5.87E-02 | 9.20E-03 | 23           | 19 | 23 | 1           | 8  | 5 | 2471            | 4993 | 5922 |
| 139.971 | 3.57E-01 | 1.00E+00 | 2.35E-06 | 18           | 16 | 23 | 1           | 6  | 1 | 321             | 162  | 1144 |
| 117.059 | 2.78E-03 | 1.22E-02 | 1.22E-02 | 23           | 23 | 23 | 1           | 6  | 6 | 581             | 520  | 548  |
| 166.971 | 7.51E-04 | 2.37E-05 | 1.50E-01 | 23           | 22 | 23 | 1           | 1  | 1 | 7440            | 6334 | 7511 |
| 168.966 | 3.84E-06 | 6.16E-06 | 5.87E-02 | 23           | 21 | 23 | 2           | 1  | 1 | 4309            | 2563 | 2274 |
| 122.980 | 9.77E-06 | 2.37E-05 | 4.38E-01 | 23           | 21 | 23 | 2           | 2  | 2 | 8274            | 5969 | 2919 |
| 127.026 | 9.77E-06 | 2.86E-07 | 1.20E-01 | 23           | 22 | 23 | 2           | 1  | 2 | 3916            | 3371 | 2552 |
| 124.978 | 2.37E-05 | 5.47E-05 | 2.90E-01 | 23           | 21 | 13 | 2           | 1  | 5 | 5640            | 2949 | 3662 |
| 126.976 | 2.37E-05 | 1.53E-05 | 1.00E+00 | 23           | 20 | 16 | 2           | 2  | 6 | 3530            | 2492 | 795  |
| 142.970 | 2.37E-05 | 8.19E-05 | 1.61E-02 | 23           | 21 | 22 | 2           | 2  | 2 | 2157            | 2356 | 2392 |
| 119.031 | 2.37E-05 | 3.62E-05 | 6.52E-01 | 23           | 23 | 13 | 2           | 12 | 5 | 1519            | 1363 | 1511 |
| 59.056  | 1.78E-04 | 2.03E-03 | 5.87E-02 | 23           | 20 | 12 | 2           | 2  | 5 | 840             | 438  | 687  |
| 83.038  | 3.62E-05 | 1.42E-06 | 1.00E+00 | 23           | 23 | 16 | 2           | 22 | 7 | 3955            | 2097 | 713  |
| 170.965 | 3.62E-05 | 2.86E-07 | 3.57E-01 | 23           | 21 | 23 | 2           | 2  | 1 | 2132            | 1633 | 1277 |
| 125.979 | 8.19E-05 | 8.19E-05 | 1.00E+00 | 23           | 22 | 16 | 2           | 1  | 6 | 1002            | 899  | 297  |
| 128.027 | 8.19E-05 | 1.42E-06 | 7.90E-01 | 23           | 22 | 23 | 2           | 1  | 2 | 709             | 599  | 549  |
| 138.976 | 1.21E-04 | 1.47E-03 | 4.58E-02 | 23           | 22 | 22 | 2           | 1  | 2 | 5214            | 4655 | 5468 |
| 120.966 | 1.21E-04 | 3.62E-05 | 6.52E-01 | 23           | 22 | 23 | 2           | 1  | 1 | 2006            | 1634 | 1580 |
| 99.033  | 1.21E-04 | 2.35E-06 | 1.00E+00 | 23           | 23 | 16 | 2           | 12 | 6 | 1289            | 680  | 345  |
| 122.962 | 5.31E-04 | 8.19E-05 | 1.50E-01 | 23           | 21 | 23 | 2           | 2  | 1 | 1172            | 1143 | 675  |

| m/z     | p-value  |          |          | Period (PER) |    |    | Phase (LAG) |    |   | Amplitude (AMP) |      |       |
|---------|----------|----------|----------|--------------|----|----|-------------|----|---|-----------------|------|-------|
|         | A        | B        | C        | A            | B  | C  | A           | B  | C | A               | B    | C     |
| 219.086 | 1.47E-03 | 1.00E+00 | 3.79E-03 | 23           | 16 | 23 | 2           | 6  | 1 | 218             | 126  | 332   |
| 214.034 | 1.47E-03 | 1.00E+00 | 2.03E-03 | 23           | 16 | 23 | 2           | 6  | 3 | 139             | 145  | 339   |
| 72.942  | 2.75E-02 | 5.87E-02 | 2.78E-03 | 23           | 16 | 18 | 2           | 2  | 2 | 2742            | 2910 | 4075  |
| 158.156 | 3.56E-02 | 9.49E-02 | 1.88E-01 | 18           | 18 | 23 | 2           | 1  | 2 | 978             | 1389 | 581   |
| 114.988 | 1.78E-04 | 1.20E-01 | 1.00E+00 | 22           | 23 | 16 | 2           | 21 | 8 | 2632            | 2863 | 1705  |
| 112.971 | 6.16E-06 | 1.05E-03 | 1.00E+00 | 22           | 23 | 16 | 2           | 12 | 6 | 2379            | 753  | 365   |
| 129.973 | 6.16E-06 | 6.16E-06 | 1.61E-02 | 22           | 23 | 18 | 2           | 12 | 3 | 1114            | 817  | 821   |
| 84.931  | 6.89E-03 | 1.61E-02 | 6.52E-01 | 14           | 12 | 15 | 2           | 3  | 2 | 2939            | 3052 | 6433  |
| 89.943  | 9.49E-02 | 3.57E-01 | 2.90E-01 | 16           | 15 | 23 | 2           | 2  | 2 | 3866            | 7643 | 11201 |
| 205.029 | 1.50E-01 | 7.49E-02 | 2.11E-02 | 23           | 23 | 23 | 2           | 2  | 2 | 411             | 717  | 1726  |
| 99.938  | 1.88E-01 | 1.50E-01 | 1.00E+00 | 14           | 23 | 16 | 2           | 1  | 6 | 485             | 638  | 513   |
| 90.951  | 4.38E-01 | 2.90E-01 | 2.90E-01 | 16           | 12 | 23 | 2           | 3  | 2 | 1211            | 591  | 1979  |
| 198.038 | 6.52E-01 | 1.00E+00 | 9.49E-02 | 23           | 16 | 23 | 2           | 6  | 1 | 283             | 256  | 436   |
| 107.953 | 9.53E-01 | 7.90E-01 | 3.57E-01 | 15           | 12 | 23 | 2           | 3  | 2 | 950             | 600  | 1497  |
| 130.982 | 3.62E-05 | 5.87E-02 | 1.20E-01 | 22           | 23 | 13 | 2           | 21 | 6 | 2083            | 1434 | 1516  |
| 197.040 | 1.61E-02 | 1.88E-01 | 6.89E-03 | 23           | 23 | 23 | 3           | 2  | 3 | 386             | 389  | 716   |
| 141.024 | 7.49E-02 | 1.00E+00 | 2.58E-04 | 23           | 16 | 23 | 3           | 6  | 1 | 439             | 522  | 881   |
| 86.997  | 1.20E-01 | 1.47E-03 | 1.20E-01 | 13           | 13 | 23 | 3           | 3  | 2 | 1376            | 2756 | 2658  |
| 100.941 | 2.34E-01 | 2.11E-02 | 9.53E-01 | 13           | 13 | 23 | 3           | 3  | 2 | 3955            | 3265 | 7971  |
| 98.945  | 6.52E-01 | 2.11E-02 | 1.00E+00 | 13           | 12 | 16 | 3           | 3  | 5 | 3912            | 5294 | 8464  |
| 109.067 | 1.88E-01 | 1.00E+00 | 7.90E-01 | 23           | 16 | 8  | 4           | 10 | 1 | 444             | 121  | 450   |
| 111.032 | 2.75E-02 | 6.89E-03 | 1.50E-01 | 11           | 13 | 18 | 5           | 3  | 2 | 2639            | 5281 | 4361  |
| 112.034 | 3.56E-02 | 1.47E-03 | 2.75E-02 | 11           | 13 | 18 | 5           | 2  | 2 | 286             | 1056 | 825   |
| 113.029 | 7.49E-02 | 7.51E-04 | 9.20E-03 | 11           | 13 | 18 | 5           | 2  | 3 | 314             | 950  | 766   |
| 113.048 | 1.20E-01 | 5.31E-04 | 7.49E-02 | 11           | 13 | 18 | 5           | 2  | 2 | 274             | 443  | 559   |
| 156.985 | 1.50E-01 | 1.22E-02 | 1.22E-02 | 11           | 13 | 21 | 5           | 3  | 2 | 1613            | 5221 | 4231  |
| 195.000 | 1.00E+00 | 6.89E-03 | 1.05E-03 | 16           | 13 | 18 | 5           | 2  | 3 | 172             | 810  | 707   |

| m/z     | p-value  |          |          | Period (PER) |    |    | Phase (LAG) |   |    | Amplitude (AMP) |      |      |
|---------|----------|----------|----------|--------------|----|----|-------------|---|----|-----------------|------|------|
|         | A        | B        | C        | A            | B  | C  | A           | B | C  | A               | B    | C    |
| 239.024 | 1.00E+00 | 9.20E-03 | 4.38E-01 | 16           | 14 | 18 | 5           | 2 | 3  | 52              | 335  | 265  |
| 197.067 | 1.00E+00 | 2.90E-01 | 2.11E-02 | 16           | 13 | 14 | 5           | 4 | 5  | 766             | 4281 | 2969 |
| 157.037 | 8.19E-05 | 5.13E-03 | 4.58E-02 | 11           | 13 | 23 | 5           | 3 | 22 | 4197            | 8331 | 9445 |
| 154.987 | 1.21E-04 | 5.13E-03 | 3.56E-02 | 11           | 13 | 21 | 5           | 3 | 12 | 1863            | 5158 | 3265 |
| 152.990 | 1.05E-03 | 1.47E-03 | 5.87E-02 | 11           | 13 | 18 | 5           | 3 | 3  | 3290            | 7765 | 5088 |
| 188.987 | 1.47E-03 | 2.03E-03 | 1.61E-02 | 11           | 13 | 23 | 5           | 3 | 22 | 882             | 1510 | 2150 |
| 198.977 | 2.03E-03 | 6.89E-03 | 1.50E-01 | 11           | 13 | 23 | 5           | 3 | 22 | 1467            | 3784 | 3482 |
| 196.981 | 3.79E-03 | 1.22E-02 | 1.88E-01 | 11           | 13 | 23 | 5           | 3 | 22 | 2418            | 6449 | 5959 |
| 142.981 | 3.79E-03 | 6.89E-03 | 3.56E-02 | 11           | 13 | 23 | 5           | 3 | 22 | 871             | 2003 | 1964 |
| 127.009 | 5.87E-02 | 3.79E-03 | 1.22E-02 | 11           | 13 | 18 | 5           | 2 | 2  | 3084            | 5927 | 7046 |
| 173.014 | 5.87E-02 | 1.47E-03 | 7.49E-02 | 11           | 13 | 23 | 5           | 2 | 22 | 662             | 1506 | 3279 |
| 159.033 | 1.50E-01 | 3.79E-03 | 5.13E-03 | 11           | 13 | 23 | 5           | 2 | 22 | 418             | 1140 | 1143 |
| 150.976 | 1.88E-01 | 9.20E-03 | 4.58E-02 | 11           | 13 | 21 | 5           | 2 | 12 | 496             | 2002 | 916  |
| 98.018  | 4.38E-01 | 1.47E-03 | 3.72E-04 | 11           | 12 | 18 | 5           | 4 | 2  | 125             | 1080 | 885  |
| 168.986 | 1.00E+00 | 2.78E-03 | 2.78E-03 | 16           | 13 | 20 | 5           | 2 | 2  | 211             | 1918 | 1201 |
| 180.985 | 1.00E+00 | 1.61E-02 | 2.58E-04 | 16           | 14 | 19 | 5           | 2 | 3  | 240             | 933  | 1329 |
| 199.981 | 2.11E-02 | 1.61E-02 | 1.20E-01 | 11           | 13 | 23 | 6           | 2 | 22 | 332             | 833  | 500  |
| 197.983 | 4.58E-02 | 5.13E-03 | 3.56E-02 | 11           | 13 | 19 | 6           | 2 | 2  | 194             | 565  | 539  |
| 153.986 | 2.90E-01 | 1.50E-01 | 3.72E-04 | 10           | 15 | 20 | 6           | 2 | 2  | 167             | 858  | 1427 |
| 185.068 | 4.38E-01 | 2.75E-02 | 6.89E-03 | 10           | 13 | 17 | 6           | 2 | 4  | 105             | 1496 | 751  |
| 97.017  | 5.35E-01 | 6.89E-03 | 1.47E-03 | 10           | 13 | 18 | 6           | 3 | 3  | 213             | 5299 | 4257 |
| 171.052 | 6.52E-01 | 1.61E-02 | 9.20E-03 | 10           | 13 | 23 | 6           | 3 | 22 | 218             | 174  | 1458 |
| 213.045 | 1.00E+00 | 9.53E-01 | 1.61E-02 | 16           | 12 | 15 | 6           | 5 | 5  | 294             | 2889 | 2332 |
| 225.012 | 3.56E-02 | 2.78E-03 | 9.20E-03 | 10           | 13 | 16 | 6           | 2 | 5  | 181             | 587  | 380  |
| 170.981 | 1.00E+00 | 5.13E-03 | 7.51E-04 | 16           | 13 | 19 | 6           | 2 | 3  | 58              | 803  | 873  |
| 146.977 | 1.00E+00 | 2.34E-01 | 2.03E-03 | 16           | 13 | 17 | 6           | 2 | 4  | 274             | 1391 | 992  |
| 206.999 | 1.00E+00 | 2.75E-02 | 1.78E-04 | 16           | 13 | 18 | 6           | 2 | 3  | 122             | 505  | 463  |

| m/z     | p-value  |          |          | Period (PER) |    |    | Phase (LAG) |    |    | Amplitude (AMP) |      |      |
|---------|----------|----------|----------|--------------|----|----|-------------|----|----|-----------------|------|------|
|         | A        | B        | C        | A            | B  | C  | A           | B  | C  | A               | B    | C    |
| 131.032 | 5.13E-03 | 2.78E-03 | 2.34E-01 | 10           | 13 | 23 | 7           | 2  | 22 | 502             | 1162 | 829  |
| 141.042 | 3.57E-01 | 3.56E-02 | 5.47E-05 | 23           | 14 | 17 | 7           | 2  | 4  | 730             | 919  | 1179 |
| 155.057 | 9.53E-01 | 3.56E-02 | 1.05E-03 | 23           | 13 | 17 | 7           | 2  | 4  | 646             | 856  | 1358 |
| 152.064 | 1.00E+00 | 1.00E+00 | 1.00E+00 | 16           | 16 | 16 | 7           | 6  | 8  | 103             | 637  | 244  |
| 155.987 | 5.87E-02 | 6.89E-03 | 2.03E-03 | 9            | 13 | 18 | 7           | 2  | 2  | 39              | 808  | 965  |
| 83.002  | 5.35E-01 | 1.47E-03 | 1.78E-04 | 9            | 13 | 23 | 7           | 3  | 22 | 51              | 1805 | 4209 |
| 214.991 | 7.90E-01 | 1.22E-02 | 2.58E-04 | 9            | 13 | 18 | 7           | 2  | 3  | 344             | 524  | 457  |
| 200.975 | 9.53E-01 | 1.61E-02 | 3.56E-02 | 23           | 13 | 19 | 7           | 2  | 2  | 1951            | 4990 | 4429 |
| 172.990 | 1.00E+00 | 3.56E-02 | 2.03E-03 | 16           | 13 | 17 | 7           | 2  | 4  | 0               | 615  | 733  |
| 129.042 | 7.49E-02 | 2.03E-03 | 1.47E-03 | 23           | 13 | 18 | 8           | 2  | 2  | 484             | 1759 | 1524 |
| 189.060 | 7.90E-01 | 5.13E-03 | 2.58E-04 | 9            | 13 | 17 | 8           | 2  | 4  | 83              | 554  | 455  |
| 128.966 | 1.00E+00 | 3.56E-02 | 1.05E-03 | 16           | 13 | 17 | 8           | 3  | 4  | 33              | 1686 | 2380 |
| 136.023 | 1.00E+00 | 1.00E+00 | 1.00E+00 | 16           | 16 | 16 | 8           | 7  | 7  | 1173            | 1994 | 1047 |
| 172.981 | 7.49E-02 | 1.22E-02 | 1.21E-04 | 23           | 13 | 18 | 8           | 2  | 3  | 196             | 774  | 393  |
| 187.009 | 1.00E+00 | 3.56E-02 | 7.49E-02 | 16           | 14 | 18 | 8           | 2  | 3  | 18              | 480  | 120  |
| 122.944 | 1.00E+00 | 6.89E-03 | 1.78E-04 | 16           | 13 | 18 | 8           | 2  | 3  | 152             | 1014 | 1157 |
| 151.025 | 1.00E+00 | 1.00E+00 | 1.00E+00 | 16           | 16 | 16 | 8           | 5  | 5  | 455             | 733  | 559  |
| 203.004 | 1.00E+00 | 1.50E-01 | 7.49E-02 | 16           | 13 | 23 | 8           | 2  | 21 | 45              | 657  | 289  |
| 160.993 | 1.50E-01 | 1.22E-02 | 2.78E-03 | 23           | 13 | 18 | 9           | 2  | 3  | 88              | 1187 | 579  |
| 112.994 | 1.00E+00 | 6.89E-03 | 2.78E-03 | 16           | 13 | 18 | 9           | 3  | 3  | 633             | 5556 | 3800 |
| 124.941 | 1.00E+00 | 3.79E-03 | 8.19E-05 | 16           | 13 | 19 | 9           | 2  | 3  | 34              | 794  | 706  |
| 114.952 | 1.00E+00 | 6.52E-01 | 3.56E-02 | 16           | 13 | 17 | 9           | 2  | 4  | 323             | 926  | 698  |
| 82.985  | 1.00E+00 | 1.05E-03 | 1.88E-01 | 16           | 14 | 23 | 9           | 2  | 21 | 27              | 533  | 1024 |
| 115.027 | 2.75E-02 | 2.75E-02 | 5.13E-03 | 21           | 13 | 18 | 10          | 2  | 3  | 936             | 2666 | 1360 |
| 203.024 | 3.56E-02 | 5.13E-03 | 3.62E-05 | 21           | 13 | 17 | 10          | 2  | 4  | 267             | 346  | 519  |
| 183.991 | 1.00E+00 | 9.53E-01 | 1.50E-01 | 16           | 23 | 13 | 10          | 17 | 5  | 184             | 1013 | 578  |
| 187.028 | 4.38E-01 | 1.00E+00 | 2.58E-04 | 21           | 16 | 21 | 10          | 9  | 12 | 191             | 547  | 214  |

| m/z     | p-value  |          |          | Period (PER) |    |    | Phase (LAG) |   |    | Amplitude (AMP) |      |      |
|---------|----------|----------|----------|--------------|----|----|-------------|---|----|-----------------|------|------|
|         | A        | B        | C        | A            | B  | C  | A           | B | C  | A               | B    | C    |
| 98.978  | 1.50E-01 | 1.20E-01 | 2.03E-03 | 20           | 15 | 23 | 11          | 8 | 22 | 908             | 2326 | 2067 |
| 101.011 | 2.34E-01 | 5.87E-02 | 2.03E-03 | 18           | 13 | 23 | 11          | 2 | 23 | 329             | 785  | 1360 |
| 144.999 | 6.52E-01 | 2.75E-02 | 9.49E-02 | 20           | 13 | 23 | 12          | 2 | 20 | 553             | 640  | 827  |
| 85.963  | 9.77E-06 | 6.52E-01 | 1.00E+00 | 20           | 23 | 16 | 20          | 0 | 6  | 1393            | 611  | 462  |
| 83.964  | 1.53E-05 | 1.00E+00 | 1.00E+00 | 20           | 16 | 16 | 20          | 6 | 6  | 1647            | 124  | 710  |
